# Supplementary material
Source: PubMed Central journal article supplement (PMC7042883)

## Supplementary Online Content

Kurian AW, Ward KC, Abrahamse P, et al. Association of germline genetic testing results with locoregional and systemic therapy in patients with breast cancer. *JAMA Oncol*. doi:10.1001/jamaoncol.2019.6400. Published online February 6, 2020.

**eTable.** Characteristics of patients according to treatment eligibility

**eFigure.** Decay diagram of patient exclusion from analytic sample

This supplementary material has been provided by the authors to give readers additional information about their work.

| <b>eTable. Characteristics of patients according to treatment eligibility*†</b> |                                  |      |                              |      |                                  |      |
|---------------------------------------------------------------------------------|----------------------------------|------|------------------------------|------|----------------------------------|------|
|                                                                                 | Bilateral Mastectomy<br>n=15,126 |      | Radiation Therapy<br>n=7,248 |      | Chemotherapy Omission<br>n=8,509 |      |
|                                                                                 | n                                | %    | n                            | %    | n                                | %    |
| Germline genetic testing result                                                 |                                  |      |                              |      |                                  |      |
| Negative                                                                        | 11,562                           | 76.4 | 5,808                        | 80.1 | 6,621                            | 77.8 |
| Variant of uncertain significance (VUS) only                                    | 2,411                            | 15.9 | 1,202                        | 16.6 | 1,355                            | 15.9 |
| Pathogenic variant (PV) in <i>BRCA1</i> or <i>BRCA2</i>                         | 823                              | 5.4  | 106                          | 1.5  | 336                              | 3.9  |
| <i>BRCA1</i>                                                                    | 438                              | 2.9  | 49                           | 0.7  | 112                              | 1.3  |
| <i>BRCA2</i>                                                                    | 439                              | 2.9  | 57                           | 0.8  | 225                              | 2.6  |
| PV in other breast cancer-associated gene <sup>†, **</sup>                      | 330                              | 2.2  | 132                          | 1.8  | 197                              | 2.3  |
| <i>ATM</i>                                                                      | 71                               | 0.5  | 27                           | 0.4  | 46                               | 0.5  |
| <i>CDH1</i>                                                                     | 7                                | 0    | 1                            | 0    | 8                                | 0.1  |
| <i>CHEK2</i>                                                                    | 148                              | 1    | 69                           | 1    | 90                               | 1.1  |
| <i>NBN</i>                                                                      | 15                               | 0.1  | 5                            | 0.1  | 8                                | 0.1  |
| <i>NF1</i>                                                                      | 1                                | 0    | 0                            | 0    | 1                                | 0    |
| <i>PALB2</i>                                                                    | 66                               | 0.4  | 20                           | 0.3  | 39                               | 0.5  |
| <i>PTEN</i>                                                                     | 5                                | 0    | 2                            | 0    | 2                                | 0    |
| <i>TP53</i>                                                                     | 23                               | 0.2  | 10                           | 0.1  | 7                                | 0.1  |
| Age in years (mean, standard deviation)                                         | 51.7                             | 12.2 | 52.8                         | 11.1 | 53.3                             | 12.2 |
| Cancer stage                                                                    |                                  |      |                              |      |                                  |      |
| 0                                                                               | 2,196                            | 14.5 | 1,236                        | 17.1 | -                                | -    |
| I                                                                               | 6,417                            | 42.4 | 3,472                        | 47.9 | 5,448                            | 64   |
| II                                                                              | 4,993                            | 33   | 2,239                        | 30.9 | 3,061                            | 36   |
| III                                                                             | 1,520                            | 10   | 301                          | 4.2  | -                                | -    |
| Tumor grade                                                                     |                                  |      |                              |      |                                  |      |
| 1                                                                               | 2,790                            | 18.4 | 1,591                        | 22   | 2,613                            | 30.7 |
| 2                                                                               | 6,443                            | 42.6 | 3,093                        | 42.7 | 4,286                            | 50.4 |
| 3                                                                               | 5,893                            | 39   | 2,564                        | 35.4 | 1,610                            | 18.9 |
| 21-gene recurrence score                                                        |                                  |      |                              |      |                                  |      |
| Not performed                                                                   | 13,544                           | 89.5 | 6,455                        | 89.1 | 6,989                            | 82.1 |
| 0-10                                                                            | 351                              | 2.3  | 172                          | 2.4  | 390                              | 4.6  |
| 11-18                                                                           | 683                              | 4.5  | 346                          | 4.8  | 718                              | 8.4  |
| 19-30                                                                           | 439                              | 2.9  | 234                          | 3.2  | 412                              | 4.8  |
| ≥31                                                                             | 109                              | 0.7  | 41                           | 0.6  | -                                | -    |

\*Treatment-eligible subgroups: for unilateral surgery, stages 0-III, unilateral tumor; for radiation therapy, all stage 0-III lumpectomy recipients except age ≥70 years with stage I, ER/PR-positive and HER2-negative disease; for chemotherapy omission, stages I-II, ER/PR-positive and HER2-negative, 21-gene recurrence score <30 if performed. All patients underwent germline genetic testing within three months of their breast cancer diagnosis.

†As designated by practice guidelines of the National Comprehensive Cancer Network (NCCN). *STK11* is also designated as a breast cancer-associated gene by NCCN, but no patients in the sample had *STK11* PVs so it was not included in the analysis.

\*\*Excludes patients who also had *BRCA1/2* PV

eFigure. Decay diagram of patient exclusion from analytic sample

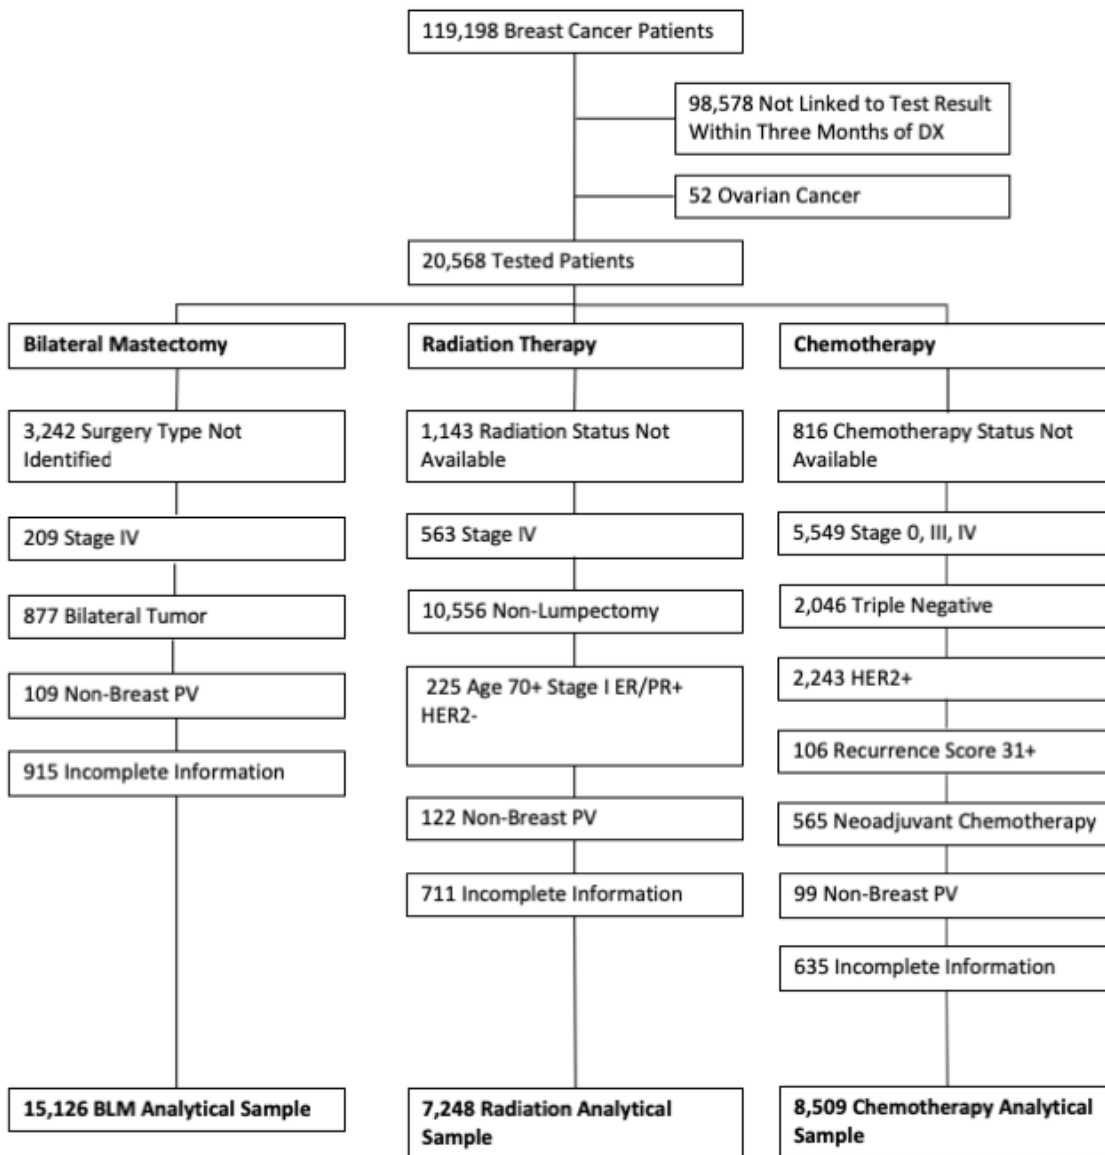

Supplement: jamaoncol-6-e196400-s001.pdf [file jamaoncol-6-e196400-s001.pdf]
